# Supplementary material
Source: PubMed Central journal article supplement (PMC5808890)
Supplement: NIHMS933931-supplement-Supplemental_tables.pdf [file NIHMS933931-supplement-Supplemental_tables.pdf]

Supplemental Table 1. Cessation outcomes by site.

| Site 1: Iowa City, IA                      |                   |                  |                                      |
|--------------------------------------------|-------------------|------------------|--------------------------------------|
| Outcome                                    | Pre-Intervention  | Intervention     | Adjusted <sup>†</sup><br>OR (95% CI) |
| <b>3-Months, %</b>                         | <b>N=97</b>       | <b>N=97</b>      |                                      |
| 7-day PPA                                  | 14.4              | 13.4             | 0.92 (0.43-1.98)                     |
| 30-day PPA                                 | 10.3              | 10.3             | 0.95 (0.46-1.96)                     |
| Any 24-hour quit attempt                   | 55.7              | 54.6             | 1.09 (0.65-1.84)                     |
| Cigarettes per day, mean (SD) <sup>‡</sup> | n=62 15.2 (9.9)   | n=66 15.5 (8.7)  | Diff: -0.40 (-3.30-2.51)             |
| <b>6-Months, %</b>                         | <b>N=95</b>       | <b>N=94</b>      |                                      |
| 7-day PPA                                  | 14.7              | 12.8             | 0.90 (0.49-1.65)                     |
| 30-day PPA                                 | 10.5              | 8.5              | 0.78 (0.36-1.67)                     |
| Repeated PPA 7 days                        | 8.4               | 8.5              | 1.03 (0.36-2.95)                     |
| Repeated PPA 30 days                       | 5.3               | 6.4              | 1.23 (0.35-4.33)                     |
| Any 24-hour quit attempt                   | 67.4              | 62.8             | 0.91 (0.52-1.57)                     |
| Cigarettes per day, mean (SD) <sup>‡</sup> | n=62, 14.3 (17.7) | n=64, 15.2 (9.4) | Diff: -0.36 (-4.86-4.15)             |

PPA = Point prevalence abstinence

\*Based on penalized imputation in which participants with missing values at follow-up are assumed to be smoking. Participants who were deceased at the time of follow-up not included.

<sup>†</sup>Models include adjustment for the following covariates (obtained during the baseline interview): total number of quit attempts lasting  $\geq 24$  hours, alcohol intake, self-rated health, and depressive symptoms as measured by the Hospital Anxiety and Depression Scale (< 8 vs. 8+).

<sup>‡</sup>Based on complete case analysis.

Supplemental Table 1. Cessation outcomes by site, continued.

| <b>Site 2: Minneapolis, MN</b> |                         |                     |                                  |
|--------------------------------|-------------------------|---------------------|----------------------------------|
| <b>Outcome</b>                 | <b>Pre-Intervention</b> | <b>Intervention</b> | <b>Adjusted†<br/>OR (95% CI)</b> |
| <b>3-Months, %</b>             | <b>N=132</b>            | <b>N=112</b>        |                                  |
| 7-day PPA                      | 15.2                    | 11.6                | 0.71 (0.32-1.64)                 |
| 30-day PPA                     | 11.4                    | 8.9                 | 0.79 (0.32-1.98)                 |
| Any 24-hour quit attempt       | 57.6                    | 47.3                | 0.71 (0.42-1.20)                 |
| Cigarettes per day, mean (SD)‡ | n=81 12.4 (7.4)         | n=76 12.0 (8.1)     | Diff: -.01 (-3.34-3.16)          |
| <b>6-Months, %</b>             | <b>N=130</b>            | <b>N=109</b>        |                                  |
| 7-day PPA                      | 10.8                    | 13.8                | 1.21 (0.53-2.78)                 |
| 30-day PPA                     | 8.5                     | 10.1                | 1.25 (0.49-3.19)                 |
| Repeated PPA 7 days            | 7.7                     | 9.2                 | 1.12 (0.40-3.11)                 |
| Repeated PPA 30 days           | 6.9                     | 7.3                 | 1.08 (0.36-3.23)                 |
| Any 24-hour quit attempt       | 66.9                    | 66.1                | 1.01 (0.59-1.72)                 |
| Cigarettes per day, mean (SD)‡ | n=75,12.5 (8.1)         | n=73,11.7 (8.1)     | Diff: 0.99 (-2.27- 4.26)         |

PPA = Point prevalence abstinence

\*Based on penalized imputation in which participants with missing values at follow-up are assumed to be smoking. Participants who were deceased at the time of follow-up not included.

†Models include adjustment for the following covariates (obtained during the baseline interview): total number of quit attempts lasting  $\geq 24$  hours, alcohol intake, self-rated health, and depressive symptoms as measured by the Hospital Anxiety and Depression Scale (< 8 vs. 8+).

‡Based on complete case analysis.

Supplemental Table 1. Cessation outcomes by site, continued.

| <b>Site 3: Omaha, NE</b>       |                         |                     |                                  |
|--------------------------------|-------------------------|---------------------|----------------------------------|
| <b>Outcome</b>                 | <b>Pre-Intervention</b> | <b>Intervention</b> | <b>Adjusted†<br/>OR (95% CI)</b> |
| <b>3-Months, %</b>             | <b>N=142</b>            | <b>N=126</b>        |                                  |
| 7-day PPA                      | 16.1                    | 15.1                | 0.91 (0.46-1.83)                 |
| 30-day PPA                     | 11.9                    | 9.5                 | 0.81 (0.36-1.84)                 |
| Any 24-hour quit attempt       | 55.9                    | 57.1                | 1.14 (0.66-1.98)                 |
| Cigarettes per day, mean (SD)‡ | n= 91 11.7 (8.6)        | n=83 13.5 (9.1)     | Diff: -0.83(-3.50-1.82)          |
| <b>6-Months, %</b>             | <b>N=140</b>            | <b>N=122</b>        |                                  |
| 7-day PPA                      | 15.7                    | 17.2                | 1.15 (0.56-2.33)                 |
| 30-day PPA                     | 10.7                    | 11.5                | 1.06 (0.42-2.67)                 |
| Repeated PPA 7 days            | 7.9                     | 10.7                | 1.48 (0.62-3.51)                 |
| Repeated PPA 30 days           | 6.4                     | 6.6                 | 1.14 (0.41-3.15)                 |
| Any 24-hour quit attempt       | 67.1                    | 62.3                | 0.85 (0.51-1.42)                 |
| Cigarettes per day, mean (SD)‡ | n=80, 12.6 (8.1)        | n=70,13.1 (8.5)     | Diff: -.99 (-3.90-1.91)          |

PPA = Point prevalence abstinence

\*Based on penalized imputation in which participants with missing values at follow-up are assumed to be smoking. Participants who were deceased at the time of follow-up not included.

†Models include adjustment for the following covariates (obtained during the baseline interview): total number of quit attempts lasting  $\geq 24$  hours, alcohol intake, self-rated health, and depressive symptoms as measured by the Hospital Anxiety and Depression Scale (< 8 vs. 8+).

‡Based on complete case analysis.

Supplemental Table 1. Cessation outcomes by site, continued.

| Site 4: Denver, CO             |                  |                 |                          |
|--------------------------------|------------------|-----------------|--------------------------|
| Outcome                        | Pre-Intervention | Intervention    | Adjusted†<br>OR (95% CI) |
| <b>3-Months, %</b>             | <b>N=92</b>      | <b>N=42</b>     |                          |
| 7-day PPA                      | 16.3             | 7.1             | 0.28 (0.06-1.33)         |
| 30-day PPA                     | 9.8              | 2.4             | 0.23 (0.03-2.01)         |
| Any 24-hour quit attempt       | 52.2             | 64.3            | 1.41 (0.66-3.04)         |
| Cigarettes per day, mean (SD)‡ | n=50 11.4 (8.1)  | n=33 12.3(8.8)  | Diff: 4.09 (-0.66-8.86)  |
| <b>6-Months, %</b>             | <b>87</b>        | <b>41</b>       |                          |
| 7-day PPA                      | 21.8             | 12.2            | 0.41 (0.12-1.39)         |
| 30-day PPA                     | 14.9             | 7.3             | 0.30 (0.06-1.48)         |
| Repeated PPA 7 days            | 9.2              | 2.4             | 0.28 (0.03-2.56)         |
| Repeated PPA 30 days           | 3.5              | 2.4             | 0.93 (0.08-11.25)        |
| Any 24-hour quit attempt       | 63.2             | 78.1            | 2.00 (0.75-5.31)         |
| Cigarettes per day, mean (SD)‡ | n=43,12.4 (10.5) | n=27,13.2 (7.3) | Diff: 3.96 (-0.86-8.78)  |

PPA = Point prevalence abstinence

\*Based on penalized imputation in which participants with missing values at follow-up are assumed to be smoking. Participants who were deceased by follow-up not included.

†Models include adjustment for the following covariates (obtained during the baseline interview): total number of quit attempts lasting  $\geq 24$  hours, alcohol intake, self-rated health, and depressive symptoms as measured by the Hospital Anxiety and Depression Scale (< 8 vs. 8+).

‡Based on complete case analysis.

Supplemental Table 2. Sensitivity analysis to examine variability in cessation outcomes based on different methods for handling missing data.\*

| Outcome               | Penalized Imputation <sup>†</sup> | Complete Case                | Multiple Imputation          |
|-----------------------|-----------------------------------|------------------------------|------------------------------|
| 7-day PPA at 3-months | 0.78 (0.51, 1.18)<br>N = 803      | 0.72 (0.47, 1.09)<br>N = 637 | 0.66 (0.43, 1.00)<br>N = 841 |
| 7-day PPA at 6-months | 0.92 (0.62, 1.37)<br>N = 780      | 0.84 (0.56, 1.25)<br>N = 593 | 0.80 (0.52, 1.23)<br>N = 818 |
| Repeated PPA          | 1.11 (0.66, 1.86)<br>N = 780      | 1.01 (0.62, 1.66)<br>N = 561 | 0.76 (0.46, 1.27)<br>N = 818 |

\*Adjusted odds ratios and 95% confidence intervals. Models adjusted for number of quit attempts lasting  $\geq 24$  hours at baseline, baseline alcohol intake, self-rated health, and depressive symptoms as measured by the Hospital Anxiety and Depression Scale (HADS-D).

<sup>†</sup>Variables used to impute missing values: study period (pre-intervention vs. post-intervention), cigarettes smoked per day (0-9 vs. 10+), depressive symptoms as measured by the HADS-D (0-7 vs. 8+), self-reported health status (very good or excellent vs. poor, fair, or good), alcohol use in the past 30 days (yes vs. no), and number of prior 24-hour quit attempts at baseline (treated as continuous variable).
